# Supplementary material for: RADpainter and fineRADstructure: Population Inference from RADseq Data
Source: PubMed Central journal article supplement (PMC5913677; doi:10.1093/molbev/msy023), 2018-02-20
Supplement: msy023_supp.pdf [file msy023_supp.pdf]

---

**Algorithm 1:** Coancestry estimation: a simple case with haploid individuals and without missing data

---

**Data:** For each locus, the sequences of nucleotides that vary between individuals

**Result:** Estimated coancestry matrix

**Init:** Initialize the coancestry matrix  $\mathbf{C}$ , so that  $C_{ij}=0$  for all  $i$  and  $j$

```
1 foreach RAD locus do
2   foreach individual  $i$  // a recipient
3     do
4       foreach individual  $j \neq i$  // potential donors
5         do
6            $D_{ij}$  = number of SNPs between  $i$  and  $j$ ;
7         end
8        $M_i = \min_{j \neq i}(D_{ij})$ ; // The minimum of  $D_{ij}$  for all  $j \neq i$ 
9        $N_{M_i} = \text{count}_{j \neq i}(D_{ij} == M_i)$ ; // Count the number of 'donors'
10      foreach individual  $j \neq i$  do
11        if ( $D_{ij} == M_i$ ) // If individuals  $i$  and  $j$  are closest,  $j$  is a 'donor'
12          then
13            // Assign an equal proportion of coancestry to each donor
14             $C_{ij} = C_{ij} + 1/N_{M_i}$ 
15          end
16        end
17      end
18 end
```

---
